# Supplementary material for: Structural and electronic properties of epitaxial multilayer h-BN on Ni(111) for spintronics applications
Source: PubMed Central journal article supplement (PMC4806377; doi:10.1038/srep23547), 2016-03-24
Supplement: srep23547-s1.pdf [file srep23547-s1.pdf]

Supplementary material for manuscript:

**Structural and electronic properties of epitaxial multilayer *h*-BN on Ni(111) for spintronics applications**

A. A. Tonkikh,<sup>1,2</sup> E. N. Voloshina,<sup>3</sup> P. Werner,<sup>1</sup> H. Blumtritt,<sup>1</sup> B. Senkovskiy,<sup>4,5</sup> G. Güntherodt,<sup>1,6</sup> S. S. P. Parkin,<sup>1</sup> and Yu. S. Dedkov<sup>7</sup>

<sup>1</sup>Max Planck Institute of Microstructure Physics, Weinberg 2, 06120 Halle (Saale), Germany

<sup>2</sup>Institute for Physics of Microstructures RAS , 603950, GSP-105, Nizhny Novgorod, Russia

<sup>3</sup>Humboldt-Universität zu Berlin, Institut für Chemie, 10099 Berlin, Germany

<sup>4</sup>Institute of Solid State Physics, Dresden University of Technology, 01062 Dresden, Germany

<sup>5</sup>St. Petersburg State University, 198504 St. Petersburg, Russia

<sup>6</sup>2nd Institute of Physics and JARA-FIT, RWTH Aachen University, 52074 Aachen, Germany

<sup>7</sup>SPECS Surface Nano Analysis GmbH, Voltastraße 5, 13355 Berlin, Germany

**List of tables and figures:**

**Fig. S1.** RHEED images of (a) Ni(111) substrate, (b) Ni buff-layer on Ni(111), and (c) a 10 ML-thick *h*-BN film on Ni(111).

**Fig. S2.** Angular resolved XPS spectra (Ni  $2p_{3/2}$  and N  $1s$ ) at different take-off angles  $\theta$ .

**Table I** Mean interlayer distances in the ml-*h*-BN/Ni(111) system for different thickness of the BN layer

**Fig. S3.** Structure of the ml-*h*-BN/Ni(111) system where *h*-BN has an A-B stacking. Distances used in Table I are marked in the figure.

**Fig. S4.** Layer resolved partial density of states (PDOS) for 1 ML-*h*-BN/Ni(111) (spin-up – top panels; spin-down – bottom panels).

**Fig. S5.** Layer resolved partial density of states (PDOS) for 2 ML-*h*-BN/Ni(111) (spin-up – top panels; spin-down – bottom panels).

**Fig. S6.** Layer resolved partial density of states (PDOS) for 3 ML-h-BN/Ni(111) (spin-up – top panels; spin-down – bottom panels).

**Fig. S7.** Layer resolved partial density of states (PDOS) for 4 ML-h-BN/Ni(111) (spin-up – top panels; spin-down – bottom panels).

**Fig. S8.** Layer resolved partial density of states (PDOS) for 5 ML-h-BN/Ni(111) (spin-up – top panels; spin-down – bottom panels).

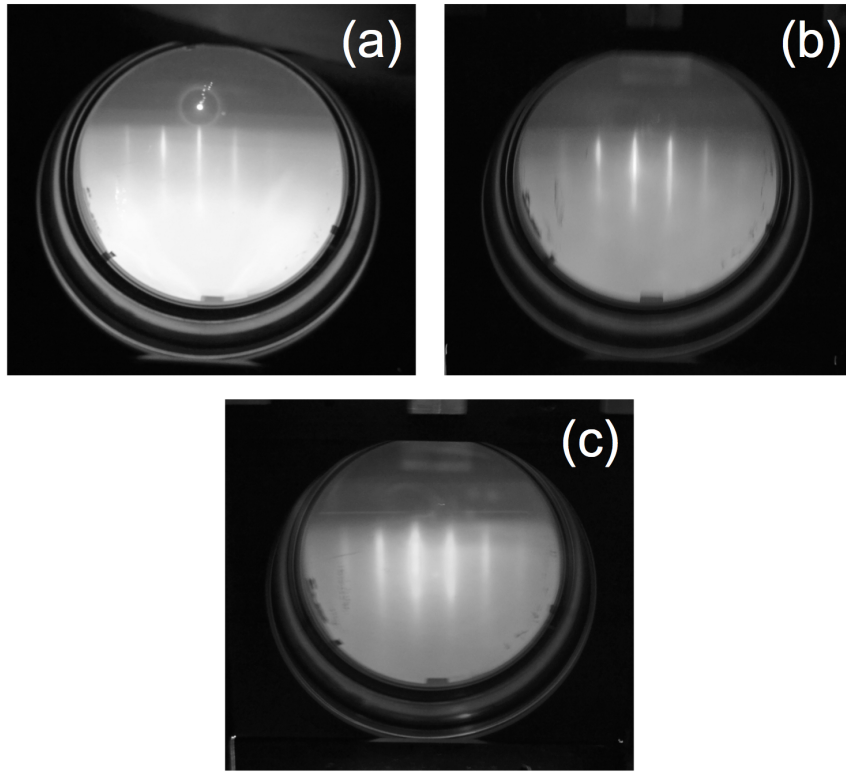

**Fig. S1.** RHEED images of (a) Ni(111) substrate, (b) Ni buff-layer on Ni(111), and (c) a 10 ML-thick *h*-BN film on Ni(111).

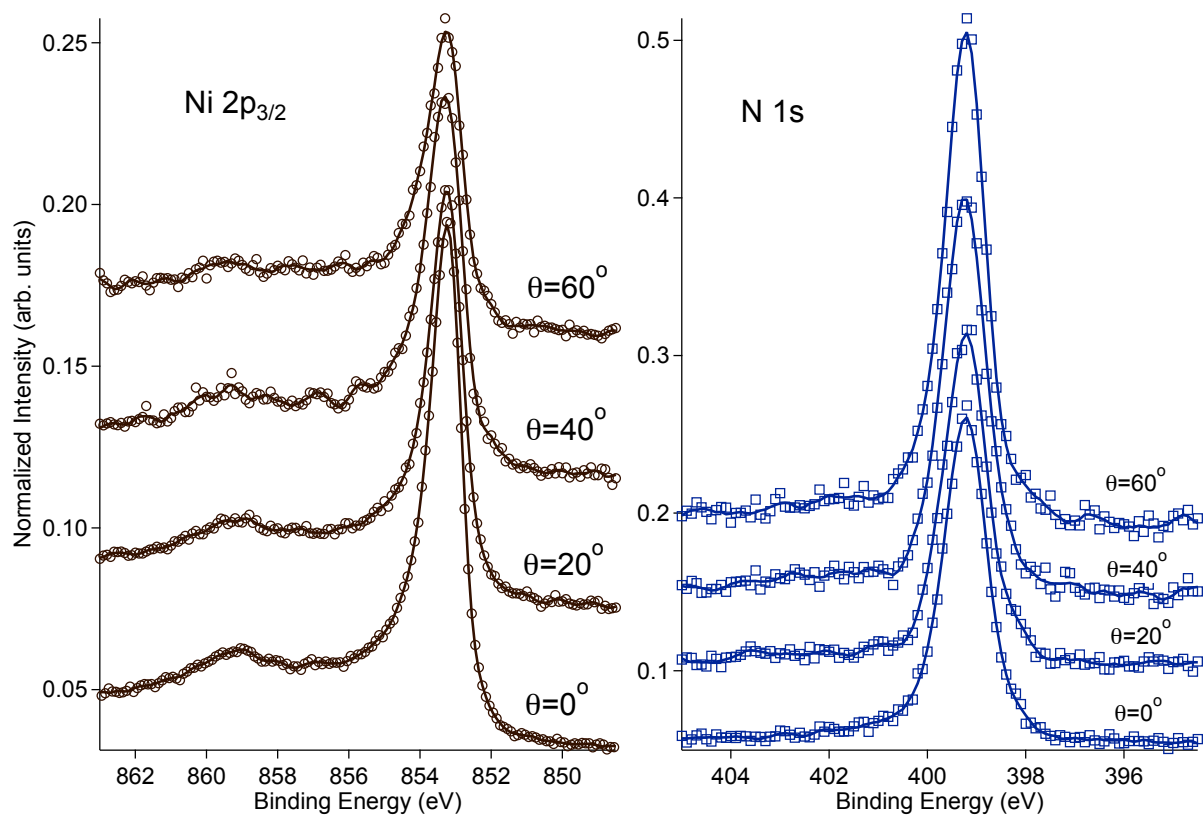

**Fig. S2.** Angular resolved XPS spectra (Ni  $2p_{3/2}$  and N  $1s$ ) at different take-off angles  $\theta$ .

TABLE I: Mean interlayer distances in the ml-h-BN/Ni(111) system for different thickness of the BN layer (see Fig. S1).

|       | 1ML BN/Ni | 2ML BN/Ni | 3ML BN/Ni | 4ML BN/Ni | 5ML BN/Ni |
|-------|-----------|-----------|-----------|-----------|-----------|
| $d_1$ | 2.04      | 2.04      | 2.04      | 2.04      | 2.04      |
| $d_2$ | 2.02      | 2.02      | 2.02      | 2.02      | 2.02      |
| $d_3$ | 2.00      | 2.00      | 2.00      | 2.00      | 2.00      |
| $d_4$ | 2.04      | 2.03      | 2.03      | 2.03      | 2.03      |
| $d_5$ |           | 3.01      | 3.00      | 3.00      | 3.00      |
| $d_6$ |           |           | 3.06      | 3.05      | 3.05      |
| $d_7$ |           |           |           | 3.06      | 3.05      |
| $d_8$ |           |           |           |           | 3.06      |

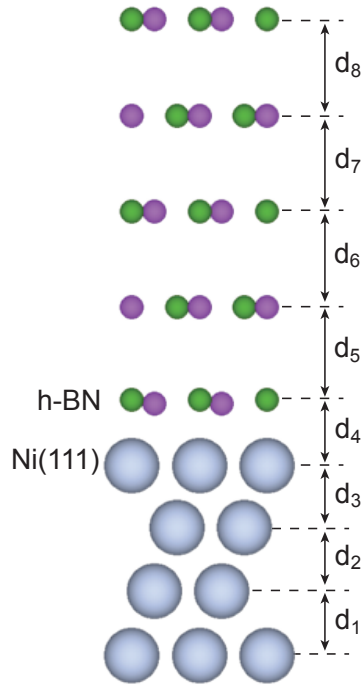

**Fig. S3.** Structure of the ml-h-BN/Ni(111) system where h-BN has an A-B stacking. Distances used in Table I are marked in the figure.

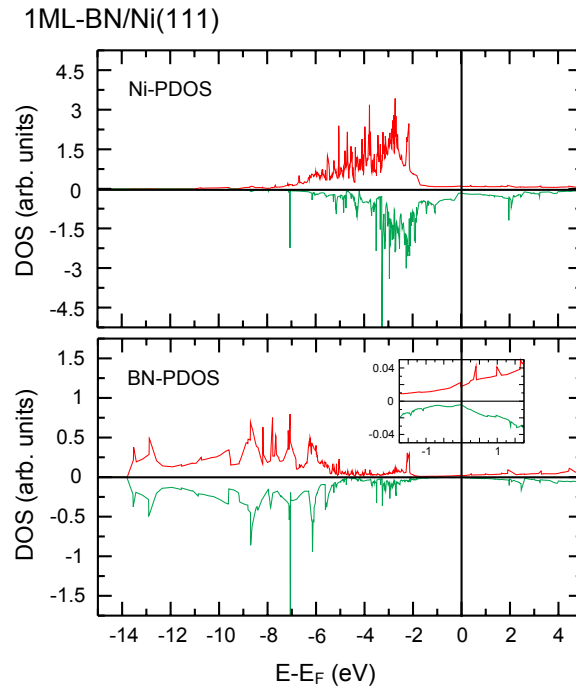

**Fig. S4.** Layer resolved partial density of states (PDOS) for 1 ML-h-BN/Ni(111) (spin-up – top panels; spin-down – bottom panels).

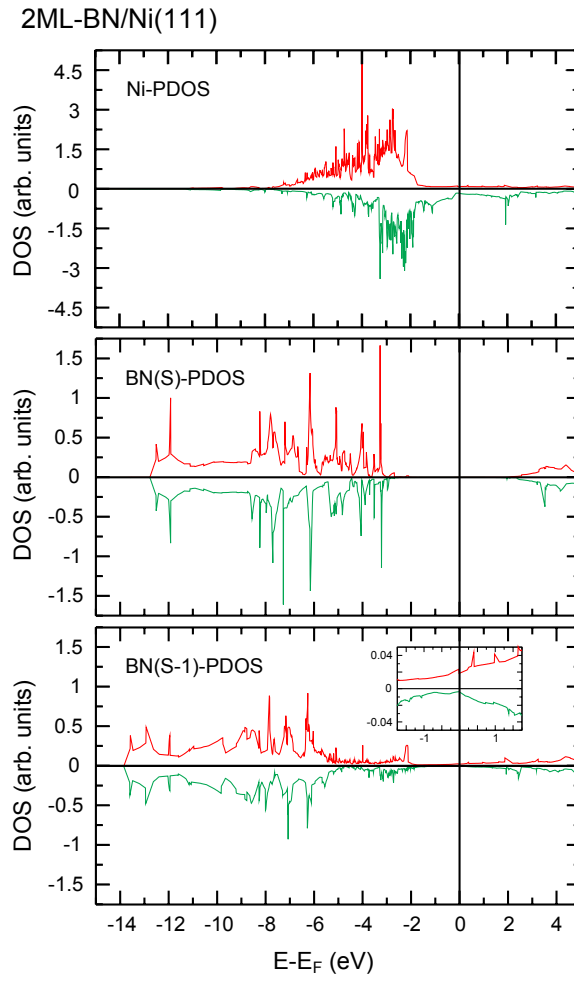

**Fig. S5.** Layer resolved partial density of states (PDOS) for 2 ML-h-BN/Ni(111) (spin-up – top panels; spin-down – bottom panels).



3ML-BN/Ni(111)

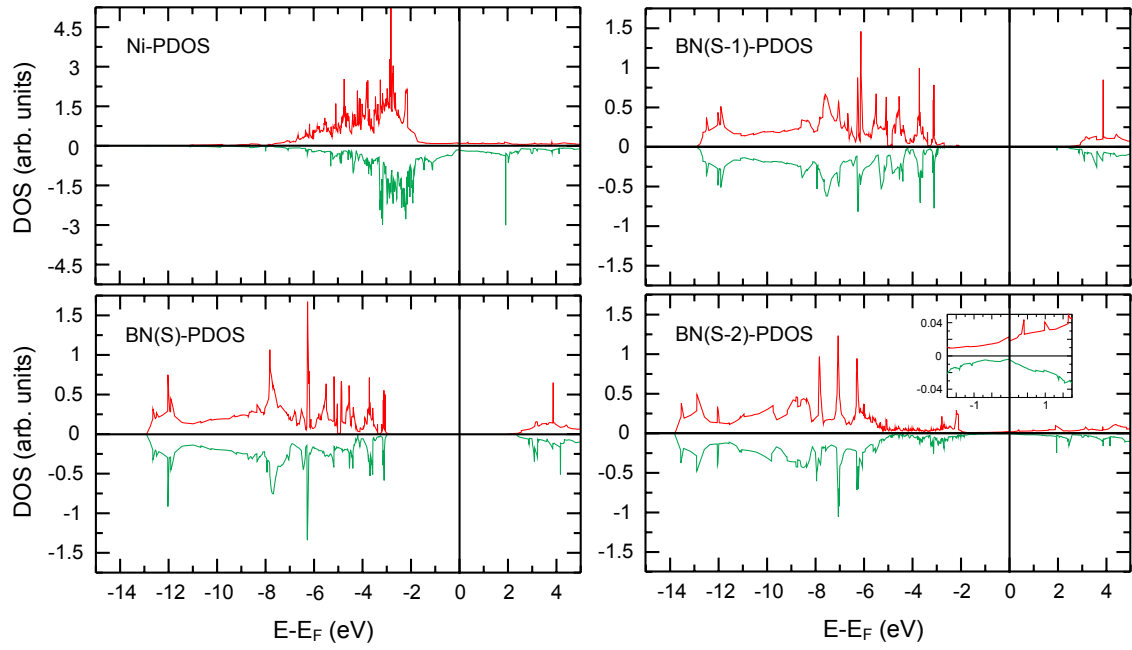

**Fig. S6.** Layer resolved partial density of states (PDOS) for 3 ML-h-BN/Ni(111) (spin-up – top panels; spin-down – bottom panels).

4ML-BN/Ni(111)

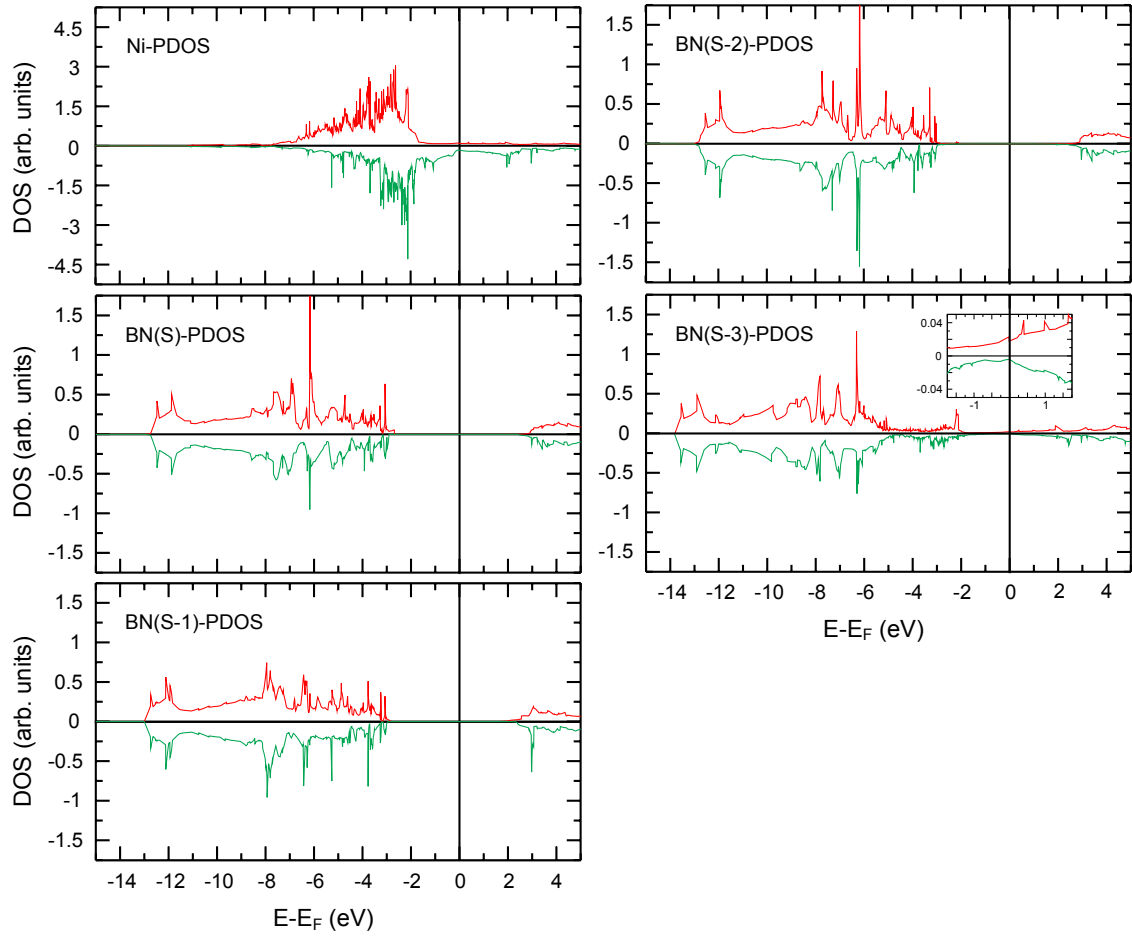

**Fig. S7.** Layer resolved partial density of states (PDOS) for 4 ML-h-BN/Ni(111) (spin-up – top panels; spin-down – bottom panels).

5ML-BN/Ni(111)

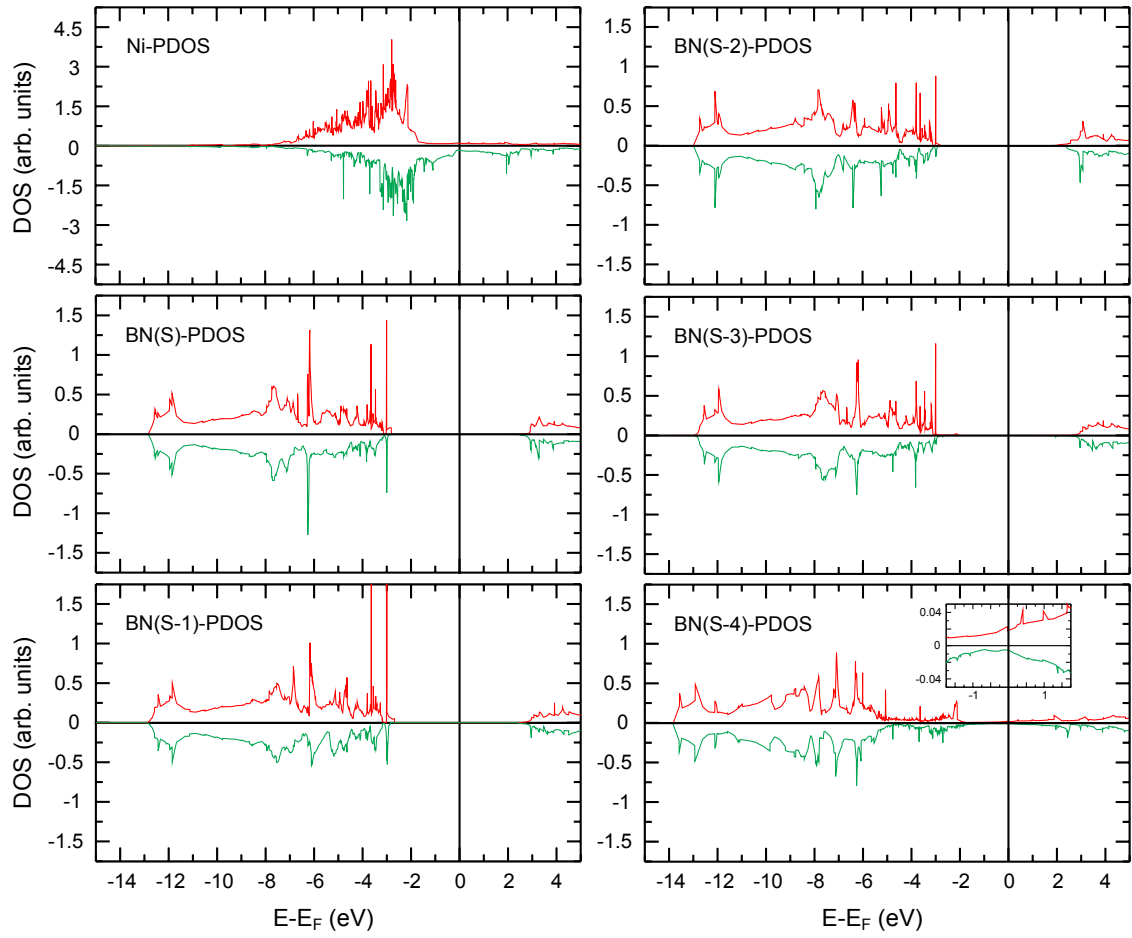

**Fig. S8.** Layer resolved partial density of states (PDOS) for 5 ML-h-BN/Ni(111) (spin-up – top panels; spin-down – bottom panels).
